# Supplementary material for: A Link between Handgrip Strength and Executive Functioning: A Cross-Sectional Study in Older Adults with Mild Cognitive Impairment and Healthy Controls
Source: MDPI journal article supplement (doi:10.3390/healthcare10020230), 2022-01-26
Supplement: s1 [file s1]

Table S1. Overview of the general characteristics of the participants.

| General characteristics of the participants | Median $\pm$ Interquartile Range<br>(Minimum to Maximum)           |                                                                    |                                                                    |
|---------------------------------------------|--------------------------------------------------------------------|--------------------------------------------------------------------|--------------------------------------------------------------------|
|                                             | aMCI ( <i>n</i> = 22; 14f/ 8m)                                     | naMCI ( <i>n</i> = 21; 9f/ 12m)                                    | HC ( <i>n</i> = 27; 19f/ 8m)                                       |
| aHGS left / right [in kg]                   | 26.3 $\pm$ 18.3 / 29.8 $\pm$ 14.4<br>(19.8 to 49.7 / 20.3 to 50.0) | 31.4 $\pm$ 13.4 / 34.5 $\pm$ 20.4<br>(17.9 to 51.6 / 19.6 to 54.6) | 26.7 $\pm$ 10.6 / 28.9 $\pm$ 13.4<br>(10.0 to 40.1 / 14.1 to 42.9) |
| MMSE [z-score]                              | -1.88 $\pm$ 0.93<br>(-3.31 to 0.37)                                | -1.87 $\pm$ 1.21<br>(-2.94 to 0.44)                                | -0.77 $\pm$ 0.74<br>(-2.08 to 0.64)                                |
| TMT A [in seconds]                          | 44.5 $\pm$ 15.8<br>(26.0 to 79.0)                                  | 41.0 $\pm$ 20.0<br>(28.0 to 101.0)                                 | 38.0 $\pm$ 18.0<br>(24.0 to 69.0)                                  |
| TMT A [z-score]                             | -0.24 $\pm$ 1.30<br>(-1.92 to 2.43)                                | -0.09 $\pm$ 1.31<br>(-2.32 to 1.63)                                | 0.36 $\pm$ 1.28<br>(-1.24 to 2.62)                                 |
| TMT B [in seconds]                          | 109.0 $\pm$ 34.3<br>(51.0 to 227.0)                                | 115.0 $\pm$ 60.0<br>(67.0 to 195.0)                                | 85.0 $\pm$ 57.0<br>(51.0 to 184.0)                                 |
| TMT B [z-score]                             | -0.46 $\pm$ 1.32<br>(-2.30 to 3.07)                                | -0.24 $\pm$ 0.92<br>(-2.00 to 1.32)                                | 0.55 $\pm$ 1.99<br>(-1.52 to 1.86)                                 |
| TMT B/A                                     | 2.25 $\pm$ 1.07<br>(1.34 to 5.28)                                  | 2.73 $\pm$ 0.92<br>(1.45 to 3.90)                                  | 2.40 $\pm$ 0.81<br>(1.43 to 5.17)                                  |

aHGS: absolute handgrip strength; MMSE: Minimal Mental State Examination; TMT: Trail Making Test. Please note that values of aHGS left in the naMCI group were based on *n* = 20 since the data of one participant in the naMCI was not used to calculate median, interquartile range, and minimum to maximum due to drop hand symptomatic in the left (non-dominant) hand.
